# Supplementary material for: The importance of diabatic processes for the dynamics of synoptic-scale extratropical weather systems—a review
Source: Copernicus journal article supplement (doi:10.5194/egusphere-2023-2678), 2023-11-22
Supplement: Supplementary file [file egusphere-2023-2678-AC1-supplement.pdf]

**The importance of diabatic processes for the dynamics of synoptic-scale extratropical weather systems—a review**

by Heini Wernli and Suzanne L. Gray

***Final author comments***

We are most grateful to the reviewers for reading this extensive review paper and for their thoughtful and constructive comments that help us to further improve the manuscript. Based on the reviewers' suggestions, we will implement several changes in the manuscript. The main changes are that:

- We will write a new subsection of Sect. 5 on “Consideration of radiative and surface flux related diabatic processes” in which we include studies on the effects on extratropical cyclones of radiative and surface flux processes including surface friction and the effects of sea surface temperatures. This subsection was added in response to comments from reviewers 2, 3, and 4, who all argued for the addition of extra material on these topics.
- We will revise some of the figures, particularly those from the older papers to try to increase their clarity (through increasing their size by rearranging the panels, and adding some elements of colour where possible) as well as adding more description of these figures and their importance in the corresponding text. We will include one additional figure illustrating how different variables evolve along warm conveyor belt trajectories. In addition, there will be two new figures in response to reviewers' suggestions, one visualizing PV inversion and one with important figures accompanying the new subsection mentioned above. Also, we carefully considered the suggestion to include our own schematics in the paper (and indeed this is something that we had considered when writing the review). However, while we liked the idea, we struggled with its realization. It is very difficult to do justice to the complexity of the theme with a few schematics. Instead, we add the schematic Fig. 1 from Schäfler et al. (2016) in Sect. 5.4 and note that we emphasized the general value of schematics in L3014 of the original manuscript.
- We greatly appreciate all of the suggested additional papers to include in our review. We will consider each of these and include those that fall within the scope of our review (we have added comments on many of the suggestions below). When writing this review, we were very conscious to define the limits of the topics that fell within scope to avoid this review becoming a far larger review of extratropical cyclones in general (scope was a topic we discussed many times), and we have applied those same limits in considering these suggested additional papers.

Below we provide a one-to-one response to all points raised by the reviewers. The reviewers' comments are in black and our [replies in blue](#).

## Reviewer 1

Recommendation: minor revisions

This paper presents a comprehensive review of the role of diabatic processes in the development and structure of weather systems, as envisaged from the nineteenth century to the present day. This is a complex topic, as the physics is dominated by small to mesoscales and there is so much variability between cyclones that it took a long time for meteorologists to agree on the nature and importance of diabatic processes compared to the mathematically elegant theories of dry baroclinic instability. Much progress on this topic has been achieved over the past twenty years and this review is timely and welcome. It should be published with minor corrections – but because of its scope and length there are a lot of these.

Many thanks for your positive overall assessment of our review article.

This is not, and should not be, a comprehensive review of every paper ever published on diabatic processes in cyclones, as the authors make clear in the Introduction. It will be most valuable as a summary of these distinguished authors' own understanding of the topic, and of the papers that led them to that understanding, as this will give the review a coherence that those unfamiliar with the field will most appreciate. Of course, much of this already comes through strongly in the manuscript and my comments will mainly be aimed at improving the flow and readability of the paper.

Many thanks for your complementary comments on our understanding and suggestions that help us to improve the readability of the paper.

I liked the structure of the review sections, with 'pauses for breath' or summaries at the end of each subsection. As my detailed comments will show, I think some of these could be developed further to provide a synthesis of the science that was revealed by the papers, rather than just reiterating what they did. Although I will concentrate here on sections 5 and 6 (following the Editor's request), these comments actually apply most strongly to the earlier sections where the evidence presented was sometimes contradictory, making it difficult to see what advances in the science actually occurred.

Thank you for your positive general remarks about the brief summary sections. We will critically review and where possible improve them such that they are most useful to the reader. In particular, we will make sure that these summaries indeed provide "a synthesis of the science" and highlight the advances that actually occurred. However, we don't want to eliminate the fact that some results were contradictory – we think that it is an essential message of this review that complex research fields like the one reviewed here do not evolve linearly but rather in parallel strands, with sometimes contradicting results and based on completely different approaches such that it takes a lot of time and further research to establish links and elaborate the consensus between these different strands.

Comments on section 5

The advent of reanalyses has indeed been a game-changer for meteorological research generally, not just for this topic, and amply merits detailed discussion in 5.1. The section is informative and reads well, but the Summary is perfunctory and adds little. What is needed here is a summary of what the reanalysis papers found e.g. regarding the distribution among cyclones of the importance of diabatic heating, its possible added relevance to the more extreme cyclones, the link to ‘atmospheric rivers’ etc. How did this approach advance the science?

We will slightly extend this summary; however, it already contains two very important points, that reanalyses allowed going beyond case studies and finding statistically robust signals, and that they led to objective cyclone classifications. The link to atmospheric rivers is, in our view, not primarily established because of reanalysis data, but again reanalyses helped to establish robust climatologies of atmospheric rivers and how they relate to cyclones etc.

Section 5.2 discusses ‘diabatic processes in (special categories of) extratropical cyclones’, presenting seven loosely-connected subsections beginning with cyclone classification.

i. I recommend that the authors reconsider the order of their subsections, moving extratropical transitions to the penultimate slot with a more natural transition to tropopause level vortices. The transition from Type C cyclones to subtropical and then Mediterranean cyclones would then be smoother.

Thank you for this suggestion to improve the order of the subsections, which we will implement.

ii. Section 5.2.1 would make more sense to a reader unfamiliar with cyclone categorisation if the authors explained what the Petterssen and Smebye A/B scheme actually is before launching into a type C discussion.

We will add a brief explanation about types A and B.

iii. The Mediterranean section should be shortened, concentrating on distinctive properties of these cyclones, other than where they occur (e.g. paragraph 1736-1746 could be omitted, and I’m not sure what the last paragraph, on moisture sources, is adding to the science).

We think that the paragraph on sensitivity studies is useful, but we agree with the reviewer that the paragraph about moisture sources can be omitted, in particular because we don’t discuss moisture sources much elsewhere in the review and arguably the source of the moisture isn’t particularly important for the diabatic processes that result.

iv. It is appropriate to include polar lows in this review because of the contribution of convection to many of them, but the section could do with editing to make the key points clearer. I suggest that the text from 1815 to 1821 be removed as it lapses into jargon inconsistent with the rest of the section and detracts from the theme of diabatic heating. Likewise, the

paragraph 1843-1858 goes into a level of detail not required here, given the existence of reviews specifically of polar lows.

We will simplify the text currently in lines L815-1821. However, we consider these studies discussing the relative importance of baroclinic and convective processes to polar low development are important to include. Regarding the comment on reviews of polar lows, although the review by Moreno-Ibáñez et al. (2021) included some discussion of potential vorticity (the topic of paragraph L843-1858) that review doesn't discuss diabatically generated PV, and we also felt it was important to re-evaluate the relevant cited papers to better link with our review.

v. To my mind Diabatic Rossby Waves are of a different order of importance to the other subsections here, as this is a distinctive dynamical process in its own right. Could this become section 5.2, then section 5.3 would include the other subsections? I leave this to the authors' discretion but it would allow for mention of DRWs in the sections that currently precede it, and better overall coherence.

We don't think that DRWs are of higher importance than the cyclone types described in the other subsections and we prefer to leave the subsections as they are. We understand the reviewer's remark that presenting DRWs earlier would make things easier in some other subsections, but every order has its particular pros and cons, and we think that the overall coherence is still fine. However, we will implement small changes that slightly enhance coherence.

vi. The summary subsection 5.2.8 is appropriate to this section.

Thanks.

Section 5.3 discusses novel diagnostics of diabatic PV modification. Again the subsections are appropriate but could benefit from some critical editing.

i. The first paragraph of 5.3.1 is too detailed – readers should consult the original papers for the detailed methodology – while the second paragraph could benefit from more examples of results obtained from PV tracer analysis.

We will look for places to shorten the detailed methodology although we consider it important to get across the limitations of this tool (as well as its benefits). We will also add some more PV tracer (and PV tendency) results, in particular describing how these studies have helped to demonstrate the relative importance of different diabatic and frictional contributions to the PV budget.

ii. The final paragraph of 5.3.2 doesn't lead anywhere – did Büeler and Pfahl find anything useful from their study? If not, this paragraph could be deleted.

We will add a little more detail about what was found in this study. Our original idea of Sect. 5.3 was to focus on the description of these different diagnostics rather than on the results of applying them, but we will embed more results throughout this section (as also indicated in our response to the comment above) and change the title of Sect. 5.3. to “Novel diagnostics of diabatic processes”

iii. On line 2175 we are cautioned that ‘caution needs to be applied when inferring dynamical causation from ensemble sensitivity analysis’ yet in the very next paragraph the word ‘sensitivity’ is used instead of ‘association’ three times! These paragraphs need to be consistent with each other.

The reviewer makes a valid point here. We have used the term “sensitivity” following the terminology in the cited papers, which describe the diagnostics plotted as sensitivity diagnostics and discuss the implied sensitivity. It would confuse readers who go from our review article to the papers if we refer instead to association. Instead, we will clarify that despite the caution that must be applied when using the Ensemble Sensitivity Analysis technique as it merely diagnoses an association, causation can be inferred when there is a plausible physical link or mechanism between the precursor field and response function. Hence, we have chosen to use the term “sensitivity” for consistency with the terminology used in the cited papers that follow.

iv. Has the adjoint technique led to any new insights into diabatic processes? The result that ‘forecasts of high-impact cyclones were found to be strongly sensitive to low to mid-tropospheric moisture in the initial state’ is hardly novel. Section 5.3.3 is one which could be considerably shortened.

We will review this text, in particular highlighting the relationship between ensemble sensitivity analysis and the adjoint technique. Studies using the adjoint technique are beginning to appear in the literature and so we consider it important to mention this technique even though we agree with the reviewer that there have been limited new insights related to our review as yet.

v. The summary is again appropriate.

Thanks.

Section 5.4 concentrates on the impact of diabatic processes on the dynamics at tropopause level, through the outflow of WCBs and tropical cyclones. I thought this was balanced and coherent, with an informative summary, and but for a couple of minor comments (see separate section below) I have no major problems with it.

Many thanks.

Section 5.5 describes the two field campaigns DIAMET and NAWDEX which the authors consider to be the only two experiments of note since 2000 to study diabatic processes in cyclones.

i. Given that extratropical transitions fall into the domain of this review, mention should also be made of T-PARC (2008).

Thank you for this suggestion. We will mention T-PARC, which was the basis of, e.g., the important study by Schäfler and Harnisch (2015), which we discuss in Sect. 5.4.3.

ii. The concept of the sting jet arose from analysis by Browning of the Great Storm that struck Southern England in 1987 and was developed by diagnosis of high-resolution models by Clark et al. This paper needs to explain more clearly what the DIAMET measurements contributed, for example by explaining what figure 16b is supposed to show. It also needs to acknowledge that the sting jet (defined as a descending airstream) is a transient phenomenon, especially when compared to the cold conveyor belt which dominates the low-level wind field in the southern quadrant of a mature cyclone.

We acknowledge that although we did say that the descent lasts only a few hours we didn't explicitly compare the timescales of the sting jet and cold conveyor belt jet. We will add this comparison to the text and also add some explanation of Fig. 16b.

iii. Although 5.5.2 is entitled 'Embedded convection', 'Embedded convection and negative PV bands' would better describe the content.

We thank the reviewer for the suggestion and have changed the heading accordingly.

Section 5 concludes with a discussion of the relevance of diabatic heating in cyclones to climate change research. On the face of it, a warmer climate will mean more moisture in the atmosphere and more scope for diabatic heating. But, as 5.6.2 shows, the problem is far from linear and the location of diabatic heating relative to the cyclone centre is critical when considering its effect on the cyclone. It appears that in a warmer climate the PV source region will be further from the cyclone centre on average – but the tail of the distribution, where the two line up, may result in a few very powerful windstorms. Very interesting!

Many thanks, writing this section was not easy; we are glad that you found it interesting.

The long discussion in 5.6.3 of the effect of model resolution on the diabatic effects on cyclones in GCMs could be shortened considerably, as the details are covered in many other papers. This review could simply summarise the conclusion of these studies, i.e. a short introductory paragraph then pick up at line 2487. Although the summary of this section is informative, I recommend that it be expanded by a few sentences to cover the issues of propagation and blocking discussed in the text.

We will consider shortening the text slightly. However, we think that a substantial discussion of model resolution is important for the following reason. Resolution of model simulations and vertical and temporal resolution of simulation output are relevant prerequisites when diagnosing the structure and evolution of weather systems and the involved physical processes

in numerical simulations. The fact that climate simulations have typically a coarser grid (compared to simulations used in studies on weather dynamics) and typically output a far more limited selection of fields than weather simulations has been a hindrance for applying sophisticated diagnostics about diabatic processes, as discussed in Sect. 5, to these simulations.

Section 6 provides a summary of the basic concepts presented in the review and looks to the future of the field. It reads well and I have no major comments on it.

Many thanks.

Minor comments

1. 1496 millenium

Corrected.

2. 1.1587 Either omit ‘only’ or restructure to ‘...revealed that only in the NH winter are cyclones usually accompanied by a strong WCB...’, depending whether the sentence is meant to contrast winter and summer as well as the two hemispheres.

Thanks, the sentence will be improved.

3. 1. 1603 The idea of a cyclone with no WCB is most likely an artifact of the definition assumed for a WCB in Binder et al.’s study (or a problem with their method) than a reflection of the dynamics of the cyclone. Read literally it means there was no ascending airstream ahead of the cyclone, which is hard to square with explosive development. The idea is counter to the whole thesis of this review and requires more discussion if considered to be a real result.

Thank you. We will explain that “no WCB” means no WCB as defined in the many trajectory studies since Wernli and Davies (1997), i.e., with a threshold criterion for ascent. Therefore, “no WCB” does not mean “no ascent from the warm sector” but that the ascent is not strong enough to meet the criterion.

4. 1. 1635. Please explain what the Petterssen and Smebye A and B cyclones actually are. The section is difficult to follow for someone not versed in cyclone classification because the story starts in the middle.

See above, we will add a brief explanation of types A and B.

5. 1.1851 lesser

Corrected.

6. 1.2330-1 Isn’t downstream development a consequence of Rossby wave propagation? The underlying dynamics are the same so this sentence needs to be re-phrased.

The study by Röthlisberger et al. (2018) identified so-called local Rossby wave initiation events that are not related to Rossby wave propagation from upstream. We agree that downstream development is related to Rossby wave propagation, but Rossby wave initiation can be independent from downstream propagation.

7. 1.2420-2425 Which simulation corresponded best to reality in this case?

Thanks, we will add this information.

8. 1. 2727 isn't the argument that, basically, the same cyclone in a warmer climate will produce more precipitation just because it is warmer (the 'Clausius-Clapeyron effect')?

This would be the argument for a single cyclone with a given intensity (e.g., in terms of minimum SLP) in a warmer climate. But here, when writing about "cyclone-related precipitation" we meant the contribution of cyclones to the climatological precipitation in a warmer climate. And when addressing this question, considering the CC effect is not sufficient, one must also consider how the frequency, intensity and propagation of cyclones changes due to warming. We will clarify the formulation.

9. 1.2979. It is provocative to claim, without evidence, that the field campaigns were a direct result of a handful of high-priority storms. For example, FASTEX was not organised as a response to the Great October Storm and DIAMET (according to its description earlier) was not organised as a response to the discovery of sting jets.

We agree that the field campaigns should not be considered a "direct result" of the catalyst cyclones and therefore we wrote that "It would be too far stretched to claim that the catalyst cyclones directly triggered the planning of field experiments" but we still think that they played a very important role in engaging the research community for these large campaigns.

10. 1.2995 The authors have chosen not to say much about satellite measurements in this review, despite the crucial role they played in the thinking of key figures in the field, such as Keith Browning. That is their prerogative, though still an omission. But one of the key conceptual tools of the satellite era was time-lapse videos from geostationary satellites, which actually show how the WCB develops alongside the cyclone and the cold front, and that should be mentioned here. It is not speculation to point out the key role of satellite images in developing understanding, and that word should be removed. So also the 'real-time availability', so important for forecasting but not for research where the better-quality images available after the event (especially in the 1980s) were more useful.

Thank you for this important remark. We remove "speculate" in L2995 and we will mention the importance of time-lapse videos from satellite and radar for investigating cloud and precipitation processes in weather systems.



## Reviewer 2

Recommendation: minor revisions

I enjoyed reading through this review. I really appreciate all of the work done by the authors to bring all of this information together and organize it in a coherent manner.

Many thanks for your very positive overall assessment of our review!

I was asked by Dr. Harnik to focus my review on Section 5. So that is what I have done.

All of my comments are minor comments. I have some additional papers that you might consider citing. I have listed them all at the end to make things more organized.

Line 1522: You mention an early reanalysis product produced by NASA for 1985– 1989, and then reference Schultz and Mass, 1993. Are you sure that is the reference you want there?

Many thanks for spotting this mistake. The correct reference here would be Schubert et al. (1993): Schubert, S. D., R. Rood, and J. Pfendtner, 1993. An assimilated dataset for Earth science applications. *Bulletin of the American Meteorological Society* **74**: 2331–2342.

Lines 1525 – 1533: I agree with you about the utility of reanalyses products, but they also have potential biases, especially in moisture processes. This seems like a good place to mention this. I believe that most of the results discussed in this review that utilize reanalysis are valid – or at least qualitatively correct at the synoptic scale. However, I also think the biases in precipitation rates and clouds in reanalyses give a reason to keep some open mind to the possibility that the reanalyses do not provide a complete and perfect picture of the physics.

Naud, C. M., J. Jeyaratnam, J. F. Booth, M. Zhao, and A. Gettelman, 2020: Evaluation of Modeled Precipitation in Oceanic Extratropical Cyclones Using IMERG. *J. Climate*, **33**, 95–113, <https://doi.org/10.1175/JCLI-D-19-0369.1>

McErlich, C., McDonald, A., Renwick, J., & Schuddeboom, A. (2023). An assessment of Southern Hemisphere extratropical cyclones in ERA5 using WindSat. *Journal of Geophysical Research: Atmospheres*, **128**, e2023JD038554. <https://doi.org/10.1029/2023JD038554>

We agree with your comment that reanalyses have biases (and we will mention this briefly in the paper). However, we do not want to include a discussion of these biases and of comparisons with remote sensing data, as this would be a topic on its own for another review article.

Line 1575: I suggest adding a sentence or two regarding the fact that the relationship between the precipitation and cyclone intensity is also subject to details about the upper-level forcing and the latitude of the cyclone. Two papers that might be relevant here:

Booth, J. F., Naud, C. M., & J. Jeyaratnam, 2018: Extratropical cyclone precipitation life cycles: A satellite-based analysis. *Geophysical Research Letters*, 45, 8647-8654. <https://doi.org/10.1029/2018GL078977>

Sinclair, V. A., and J. L. Catto, 2023: The relationship between extra-tropical cyclone intensity and precipitation in idealised current and future climates, - *Weather and Climate Dynamics*.

Thank you, the 2<sup>nd</sup> paper is relevant for the theme of our review and will be included; however, it fits even better to the discussion in Sect. 5.6.

Line 1617: Section 5.2. Let me start by saying that I think this review article is already 100% sufficient. It is quite long as well. So, I am giving the following recommendation with caution. I will agree with the authors if they choose to ignore this suggestion. I wonder if you might consider adding a subsection in 5.2 on more recent work on energy fluxes from the surface and their role in the diabatic forcing of ETCs.

Many thanks for this suggestion, which resonates with comments from reviewers 3 and 4. We therefore decided to include an additional subsection in Sect. 5 about diabatic processes not related to latent heating in clouds. This subsection, entitled “Consideration of radiative and surface flux related diabatic processes”, will include discussions about the role of radiation, turbulence, and surface heat fluxes.

The most recent work that I know of on the topic is this one:

Demirdjian, R., J. D. Doyle, P. M. Finocchio, and C. A. Reynolds, 2023: Preconditioning and Intensification of Upstream Extratropical Cyclones through Surface Fluxes. *J. Atmos. Sci.*, 80, 1499–1517, <https://doi.org/10.1175/JAS-D-22-0251.1>.

Within that work, the authors will see that there have been other relatively recent works focused on low-level diabatic heating and the associated surface fluxes. As I said though, I would be completely fine if the authors decided that this work is outside of the scope of their review.

Thank you, we will include this and some other important recent studies on the subject in the new subsection.

Line 2810 or elsewhere in Section 5.6.3: You should consider referring to Hawcroft et al. 2017.

Hawcroft, M. K., H. Dacre, R. Forbes, K. Hodges, L. Shaffrey, and T. Stein, 2017: Using satellite and reanalysis data to evaluate the representation of latent heating in extratropical cyclones in a climate model. *Climate Dyn.*, 48, 2255–2278, <https://doi.org/10.1007/s00382-016-3204-6>.

Very good suggestion, thanks. We will include a reference to this paper, which fits well with the statement on L2810.

### Reviewer 3

Recommendation: minor revisions

General comments:

This article reviews the historical progress and current understanding for the effect of diabatic heating on the extratropical weather systems. In the section 2, several kinds of theoretical framework to understand the effect of diabatic are described. Historical overview from 19th century for the studies for the impact of diabatic heating on the intensification of cyclones is described in the section 3. Then, the detailed results of studies for the diabatic effects on cyclones are reviewed in section 4. I really enjoyed reading the article, and I believe that this article is highly valuable for readers to know the historical overview and current understanding for the diabatic effects in extratropical weather systems. Overall, the article is well structured and is easy to read. Thus, I recommend that this article can be published, although I have just several recommendations to add references for the statistical study of cyclones in the Pacific.

Many thanks for your very positive overall assessment of our review! And many thanks for your suggestions to add more references about North Pacific cyclones.

Specific comments:

The descriptions for explosively developing cyclones in Pacific is relatively low compared with those in Atlantic. More descriptions and references may be added in the section 4.1.4. e.g., Yoshida, A., and Y. Asuma, 2004: Structures and environment of explosively developing extratropical cyclones in the northwestern Pacific region. *Mon. Wea. Rev.*, 132, 1121–1142. [https://doi.org/10.1175/1520-0493\(2004\)132<1121:SAEOED>2.0.CO;2](https://doi.org/10.1175/1520-0493(2004)132<1121:SAEOED>2.0.CO;2)  
Zhang, S., G. Fu, C., Lu, and J., Liu, 2017: Characteristics of Explosive Cyclones over the Northern Pacific, *J. Appl. Meteor. and Clim.*, 56(12), 3187-3210. <https://doi.org/10.1175/JAMC-D-16-0330.1>

Thank you, we will include references to these studies in the revised manuscript.

The adding of descriptions for recent studies for the effects of SST front and associated surface fluxes on the structures and dynamics of extratropical cyclones would be useful for readers if it is possible. e.g.,

Bui, H., & Spengler, T. (2021). On the influence of sea surface temperature distributions on the development of extratropical cyclones. *Journal of the Atmospheric Sciences*, 78(4), 1173-1188.

Demirdjian, R., Doyle, J. D., Finocchio, P. M., & Reynolds, C. A. (2022). On the influence of surface latent heat fluxes on idealized extratropical cyclones. *Journal of the Atmospheric Sciences*, 79(9), 2229-2242.

Hirata, H., Kawamura, R., Kato, M., & Shinoda, T. (2015). Influential role of moisture supply from the Kuroshio/Kuroshio Extension in the rapid development of an extratropical cyclone. *Monthly Weather Review*, 143(10), 4126-4144.

- Reeder, M. J., Spengler, T., & Spensberger, C. (2021). The effect of sea surface temperature fronts on atmospheric frontogenesis. *Journal of the Atmospheric Sciences*, 78(6), 1753-1771.
- Tochimoto, E., & Niino, H. (2022). Comparing frontal structures of extratropical cyclones in the northwestern Pacific and northwestern Atlantic storm tracks. *Monthly Weather Review*, 150(2), 369-392.
- Tsopouridis, L., Spensberger, C., Spengler, T., 2021a: Characteristics of cyclones following different pathways in the Gulf Stream region. *Quart. J. Roy. Meteor. Soc.*, 147, 392–407. <https://doi.org/10.1002/qj.3924>
- , Spensberger, C., Spengler, T., 2021b: Cyclone intensification in the Kuroshio region and its relation to the sea surface temperature front and upper-level forcing. *Quart. J. Roy. Meteor. Soc.*, 147, 485–500. <https://doi.org/10.1002/qj.3929>

Many thanks for this suggestion, which resonates with comments from reviewers 2 and 4. We therefore decided to include an additional subsection in Sect. 5 about diabatic processes not related to latent heating in clouds. This subsection will include discussions about the role of radiation, turbulence, and surface heat fluxes (and the role of SST).

## Reviewer 4

Recommendation: Major revisions

### General Comments:

The authors have put a lot of effort in summarizing and reviewing the evolution of our thinking of the effects of diabatic processes on synoptic-scale cyclone development. As usual, with such attempts, it is difficult to do the entire field of research justice and certain selections must be made by the authors in terms of focus. While the review is quite extensive, some recent literature and arguments have not been included thus far. Furthermore, potentially related to the background and work of the two authors, the manuscript focuses mainly on PV diagnostics based on Lagrangian, tracers, or other direct diagnostics of PV. Hence, the title might be a bit misleading and should potentially reflect this choice.

We regard the title of the paper as appropriate, even if we agree that the paper has a focus on studies using PV diagnostics. Section 5.3 also discusses several new diagnostics that are not PV focused (we therefore changed the title of this section to “Novel diagnostics of diabatic processes”). Many other parts of the paper do not use PV concepts at all (e.g., large parts in Sect. 4.2, 4.3 and 5.6), or in other words, important parts of the paper would be out of scope if the PV focus was included in the title.

In addition, the manuscript reads more like an extensive summary of research conducted the last decades and one and a half centuries but does not necessarily do justice to the term “review”. Review, to me, would imply that the authors go beyond summarizing the material and provide a more detailed discussion of the different methods, their pros and cons, as well as if the community along the way concluded on the adequacy, or lack thereof, of different concepts, diagnostics, and theories. Such a review of diagnostics, concepts, theories would be highly desirable. For example, most scientists would probably not anymore believe that CISC is really an appropriate concept for moist-baroclinic development.

In our view there are several ways of writing “good”, i.e., interesting and useful review papers and we fully acknowledge that with our more “descriptive and narrative style” we cannot do justice to those who expect a more “opiniated and judging style”. We think that we included quite a bit about the pros and cons of the methods (e.g., in Sect. 4.2.1) and in the revised version of the paper, we will take care that we add some more pros and cons where appropriate. The point raised about whether “the community along the way concluded on the adequacy, or lack thereof, of different concepts, diagnostics, and theories” is an interesting one but difficult to address, mainly for two reasons: (i) it is risky to judge on this in hindsight (we read papers from 40 years ago with the knowledge obtained since then, which does not provide an objective view on what the community thought 40 years ago), and (ii) as we try to emphasize throughout the paper, this field profited from very complementary and diverse approaches, and it took decades for the community to see common elements of, for instance, highly idealized theoretical studies (e.g., Sect. 4.3.1) and observations from field campaigns (e.g., Sect. 5.5). Also, because of the broad support of the five other reviewers, we are confident that this style of a review paper also has its merits.

The authors provide a general introduction to latent heating, which is maybe not needed given the audience. There is also a rather lengthy introduction of symmetric instability, which is potentially also beyond the focus of this review. In general, the part on slantwise convection seemed a bit out of place given the focus is mostly on synoptic scales.

The section on slantwise moist convection, moist PV and SCAPE is about three pages long and the concept of conditional symmetric instability (CSI, the release of which often leads to slantwise convection) comes up in several places in the review: particularly in Sect. 4.1.2 on “Further explosive cyclone cases”, Sect. 4.2.3 on the “PV perspective on moist vs. dry experiments”, Sect. 5.1 on “Reanalyses and weather system climatologies”, and Sect. 5.5.1 on “Sting jets”. Hence, we argue that an introduction to this instability is necessary in our review. As this instability is somewhat complicated to explain, partly due to its link with other mesoscale and convective scale instabilities, the text needed to explain it at the level needed for a reader who is new to these instabilities is relatively substantial (even when linking, as we do, to reviews and textbook explanations).

Given the authors’ background, their almost exclusive focus on PV is understandable, though there have also been other attempts to understand the effects of diabatic heating on the synoptic evolution that remain unmentioned. For example, the diagnostic of the tendency of baroclinicity (Papritz and Spengler, 2015), which has subsequently been used to postulate the hypothesis that cyclone clusters are formed diabatically (Weijenborg and Spengler, 2021) is not mentioned. This concept does neither rely on neglecting certain parts of the flow (PV only deals with the circulation on theta surfaces) nor on having to separate into a basic state and anomaly, while it clearly demonstrates the workings of diabatic forcing on the synoptic, and even larger-scale, evolution.

As we mention below, due to this review and comments from reviewers 2 and 3, we decided to include a new subsection specifically about diabatic processes not related to latent heating in clouds, i.e., surface heat fluxes, radiation, and turbulence. The study by Papritz and Spengler (2015), with its interesting results about surface heat fluxes, fits well into this subsection.

When the authors introduce the concept of PV in 2.1, the discussion lacks a discussion of the disadvantages of the usage of PV. For example, equation (1) highlights the fact that only that part of the circulation that is perpendicular to the gradient of theta is represented by PV, i.e., only the circulation within a theta surface.

We are not sure why this is a “disadvantage”. It reflects the fact that the balanced flow is determined by a quantity we call PV (and suitable boundary conditions). The omega equation then helps to obtain information about vertical motion.

All other parts of the circulation are neglected and can thus also not be addressed by the PV tendency in equation (3). Examples for such kind of circulations would be a sea-breeze, or frontal circulations. Of course, in a QG framework, these would be regarded as ageostrophic and thus potentially of lower relevance, but the implications and limitations of using a PV

framework should be more clearly stated. The formulation in equations (5)-(7) could have been related to the circulation theorem, which yields the same result (implied impermeability), when only choosing that part of the circulation that projects on a theta surface.

Thanks for sharing these views about the PV framework. When we mention the usefulness of the PV concept, then we don't regard PV in isolation. Rather, e.g., in a QG framework, we mean that PV determines the geostrophic flow, which in turn determines the ageostrophic flow. For the context of this review article, this conceptual framework still holds, with the additional (complicated) element that diabatic processes can create or destroy PV, and in this way modify the flow. We will make sure that our brief summary of the PV concept in Sect. 2.1 does not convey the wrong impression that PV directly represents the 3-dimensional flow.

With respect to the interpretation of the detected tendencies and changes in PV (e.g., section 5.3.2 and others), one should be aware that to understand the system and its evolution, it is not sufficient to merely quantify changes in PV. For example, while evaporation below an area of latent heating might yield a stronger PV anomaly at the interface between these differently signed diabatic forcing, the actual effect on the evolution of the cyclone might still be detrimental (Haualand and Spengler, 2019). Thus, the discussion of diagnosed anomalies should be put in more context to the overall development when presenting the derived fields, trajectories, and tracers.

Thank you. We fully agree with the reviewer that understanding how diabatic processes affect individual PV anomalies is not enough to eventually understand their effect on weather systems and their evolution. For this, the mutual interaction of PV anomalies, which is strongly influenced by their location, size and aspect ratio, is key. But in order to study the interaction of PV anomalies, an essential step is to understand how they are formed and modified, which is discussed in detail in the paper. However, we also explicitly discuss examples that go against the first order assumption that stronger positive PV anomalies imply a stronger cyclone. For example, on p. 29 (L743) we discuss that the indirect effects of a positive PV anomaly generated by surface friction led to a weaker cyclone (counter to the stronger cyclone expected from the inversion of the positive anomaly) in the Stoelinga (1996) paper, and in Sect. 5.3.2. we discuss mechanisms for this from more recent studies. In the revised manuscript, we will emphasize more broadly that the impact of PV anomalies on cyclones cannot be inferred simply from the sign of the PV anomaly, particularly in our new section on "Consideration of radiative and surface flux related diabatic processes".

I am admittedly not too familiar with all the detailed historic developments in the field prior to the mid 20ies century and greatly appreciate the effort the authors put into providing a wider historic overview of the concepts of cyclone development. However, it feels strange that the work of the Bergen School of Meteorology is not mentioned when it comes to the concepts of the structure and airstreams in cyclones, as several seminal papers on the structure of cyclones came out of this school. Even though the naming of the airstreams and sectors of cyclones at the time was different, the cold and warm/moist airstreams were clearly depicted in their conceptual cyclone models. These contributions should be included in sections 3.1 and 3.2.

Many thanks, this is a very good point. We indeed overlooked the warm and cold air currents, e.g., in Fig. 6 of Bjerknes (1919) about “On the structure of moving cyclones”. We are most happy to remedy this oversight.

With respect to polar lows in section 5.2.5, Terpstra et al. (2015) stressed the role of diabatic processes, despite them often being argued to be small due to the low values of absolute available moisture. One of the main arguments of Terpstra et al. (2015) being that despite the diabatic heating being significantly smaller than in extratropical cyclones, the effect on the PV tendency is comparable to extratropical cyclones, because the vertical extent is also significantly reduced, thereby increasing the effect of the gradient of the heating on the PV tendency. Furthermore, Stoll et al. (2021) clearly classified polar lows as moist baroclinic cyclones in a recent climatological analysis, while clarifying that the genesis through hurricane-like processes is rather unlikely, due to the excessive amounts of baroclinicity and shear at the genesis time. In general, the notion of an upper-level PV anomaly must be applied with caution for polar lows, as the usual altitude chosen to detect these PV anomalies are well within the stratosphere and thereby not necessarily directly relatable to the development of the surface-based polar lows. Furthermore, these upper-level anomalies are often of much larger character than the developing polar low, also rendering a direct interaction questionable.

We already acknowledged the work by these authors in our review: “Of particular note is the idealised high-latitude moist baroclinic channel simulation study of Terpstra et al. (2015) in which they showed that a weak disturbance with a PV structure consistent with a shallow diabatic Rossby wave (Sect. 5.2.6) is able to develop in the absence of an upper-level initial perturbation, surface fluxes, friction and radiation; however, they noted that additional forcing is likely required to produce more realistic polar low intensities”. We also included the earlier ERA-Interim based climatology of Stoll et al. (2018). We will also include the more recent paper by Stoll et al. (2021) as a recent addition to the debate over the relative importance of baroclinic and convective processes in polar low development.

The surface pressure tendencies introduced at the beginning of 5.3.4 are significantly flawed (Spengler and Egger, 2009). A simple thought experiments directly reveals the false physical nature of the diagnostic. Assume a horizontally uniform atmosphere, equivalent to an atmospheric column with no horizontal advection, which is initially motionless and where a mid-tropospheric heating is applied. Note that all concepts are hydrostatic. In such a hydrostatic setup, the heating cannot result in a direct change of surface pressure, which can only be caused by horizontal mass rearrangements (secondary circulation), or precipitation (Spengler et al., 2011). However, the diagnostic introduced by the various authors in section 5.3.4 directly implies a “diabatic” surface pressure tendency, which is not physical and points to a significant flaw in the diagnostic. Such an attribution could at best be achieved in a balanced framework, such as QG, though then the challenge is to define suitable boundary conditions for the inversion that is difficult to prescribe a priori (Spengler and Egger, 2012).

Thank you, we will add a remark about this issue. In their reply, Fink and colleagues accepted that Spengler and Egger (2009) have identified an issue that means that the magnitude and



extent of the pressure fall diagnosed by the PTE is problematic in certain situations. They however argued that the overall interpretation of their original paper stands.

Related to predictability and the effects on the upper troposphere, a recent study highlighted the importance of diabatic heating compared to tropopause structure for initial error growth (Hualand and Spengler, 2021). Even more drastic changes, or implied initial errors, along the tropopause are easily dwarfed by the effects of misrepresenting latent heating.

Thanks for your suggestion to include this study. Indeed, the result about the importance of uncertainties in latent heating for baroclinic wave development, compared to uncertainties in the tropopause structure, quantified in an idealized simulation setup, are relevant for the theme of this review and can be included in Sect. 5.4 – although we intentionally did not review papers about how forecast errors result from misrepresenting diabatic processes to avoid our review paper growing even longer than it now is.

Given that the authors state that they “touch on the effects of [...] surface fluxes, in particular where studies have contrasted the effects of these processes with the effects of latent heating”, it is surprising that recent studies highlighting the direct and indirect (enhanced latent heat release due to latent heat fluxes) effects of surface fluxes are not mentioned (Hualand and Spengler, 2020; Bui and Spengler, 2021). Previous studies in general showed that surface sensible heat fluxes have a detrimental effect, as they reduce baroclinic structure in the cyclone, while these more recent studies emphasise that the additional latent heat release available due to the surface latent heat fluxes can easily dominate the cyclone development in a favourable way.

Thank you for emphasizing the importance of surface heat fluxes. As mentioned above, we decided to include an additional subsection about diabatic processes not related to latent heating in clouds. This subsection will include discussions about the role of radiation, turbulence, and surface heat fluxes.

Line 636-647: It is not clear what this discussion of lee cyclogenesis has to do with the main topic of the review article, i.e., the importance of diabatic processes. Consider removing or putting in context.

We found it interesting that early studies about Alpine lee cyclones did not consider moist processes, in a period (1982-1998) when, e.g., North American cyclone research focused a lot on diabatic processes. We will slightly rephrase this paragraph to better put it in context.

#### References:

- Bui, H. and Spengler, T. (2021). On the Influence of Sea Surface Temperature Distributions on the Development of Extratropical Cyclones. *J. Atmos. Sci.*, 78, 1173-1188, <https://doi.org/10.1175/JAS-D-20-0137.1>
- Hualand, K. F., and Spengler, T. (2019). How Does Latent Cooling Affect Baroclinic Development in an Idealized Framework? *J. Atmos. Sci.*, 76, 2701-2714, <https://doi.org/10.1175/JAS-D-18-0372.1>

- Hualand, K. F., and Spengler, T. (2020). Direct and Indirect Effects of Surface Fluxes on Moist Baroclinic Development in an Idealized Framework. *J. Atmos. Sci.*, 77, 3211-3225, <https://doi.org/10.1175/JAS-D-19-0328.1>
- Hualand, K. F. and Spengler, T. (2021). Relative importance of tropopause structure and diabatic heating for baroclinic instability, *Weather Clim. Dynam.*, 2, 695–712, <https://doi.org/10.5194/wcd-2-695-2021>
- Papritz, L., and Spengler, T. (2015). Analysis of the slope of isentropic surfaces and its tendencies over the North Atlantic. *Q. J. Roy. Met. Soc.*, 141, 3226-3238, <https://doi.org/10.1002/qj.2605>
- Spengler, T., and Egger, J. (2009). Comments on “Dry-Season Precipitation in Tropical West Africa and Its Relation to Forcing from the Extratropics”. 137, 3149-3150, <https://doi.org/10.1175/2009MWR2942.1>
- Spengler, T., and Egger, J. (2011). How Does Rain Affect Surface Pressure in a One-Dimensional Framework? *J. Atmos. Sci.*, 68, 347-360, <https://doi.org/10.1175/2010JAS3582.1>
- Spengler, T., and Egger, J. (2012). Potential Vorticity Attribution and Causality. *J. Atmos. Sci.*, 2600-2607, <https://doi.org/10.1175/JAS-D-11-0313.1>
- Stoll, P. J., Spengler, T., Terpstra, A., and Graversen, R. G.: Polar lows – moist- baroclinic cyclones developing in four different vertical wind shear environments, *Weather Clim. Dynam.*, 2, 19–36, <https://doi.org/10.5194/wcd-2-19-2021>
- Terpstra, A., Spengler, T., and Moore, R. (2015). Idealised simulations of polar low development in an Arctic moist-baroclinic environment. *Q. J. Roy. Met. Soc.*, 141, 1987-1996, <https://doi.org/10.1002/qj.2507>
- Weijenborg, C., and Spengler, T. (2020). Diabatic heating as a pathway for cyclone clustering encompassing the extreme storm Dagmar. *GRL*, 47, e2019GL085777. <https://doi.org/10.1029/2019GL085777>

## Reviewer 5 (Lance Bosart, Tyler Leicht and Alexander Mitchell)

Recommendation: Accept with minor revision (lots of little things)  
A potpourri of possible additional references is also appended.

### Overview:

Wernli and Gray have produced a very valuable, highly informative, and an extensively documented research review paper on the importance of diabatic processes that govern the dynamics of synoptic-scale extratropical weather systems. This extensive research review paper will be both a very valuable addition to the refereed literature and a “must have” document for advanced graduate students and early career scientists who have strong research interests in synoptic-dynamic meteorology. Noteworthy attributes of this synoptic-dynamic meteorology review paper include: 1) a broad-based historical perspective on the scientific ideas that have governed the field synoptic-dynamic meteorology going back to the 19th century, 2) an assessment of the original thinking that resulted in critical new breakthroughs in the development of innovative fundamental science ideas that have driven the growth of synoptic-dynamic meteorology, 3) an overview of critical past and present research in synoptic-dynamic meteorology that has driven the field forward, and 4) an outlook for future new research opportunities going forward that could further broaden and deepen the field. This extensive and detailed synoptic-dynamic meteorology review paper is suitable for both advanced graduate students and early career scientists who possess a strong interest in synoptic-dynamic meteorology.

Bottom line: “The importance of diabatic processes for the dynamics of synoptic-scale extratropical weather systems—a review” is thorough and offers a comprehensive overview of the history of extratropical cyclone dynamics using a PV framework. The authors demonstrate a strong foundation of synoptic-scale extratropical dynamics and present a clear and accessible synthesis of the historical literature. The inclusion of recent references and an overall balanced discussion add significant value for the reader.

We are most grateful for this detailed and very positive overall assessment of our review and for the many constructive suggestions you and your PhD students made in the following comments!

### Introduction:

Wernli and Gray write: “the main three aims of this review article are (i) to provide evidence that our understanding of how diabatic processes affect extratropical weather systems has grown considerably since the review article on PV by Hoskins et al. (1985) and the comprehensive book chapter on the rapid intensification of extratropical cyclones by Uccellini (1990), (ii) to portray in detail the historical evolution of a specific research field over several decades and thereby to exemplify how scientific progress results from the combination and integration of complementary research approaches, and (iii) to promote the relevance of this research area in dynamical meteorology.” This purpose statement is accompanied by a schematic overview figure that outlines the text pathways that follow.

## Theoretical Background:

I didn't realize how much hard-core fundamental theoretical and dynamical meteorology I had forgotten (please forgive me, Joe Pedlosky) until I read through Ch. 2. That said, I think that this chapter as written in several places can come across as a bunch of research fluid dynamicists talking more to themselves than the intended audience. An example would be the discussion surrounding Fig. 2. Several of the panels in Fig. 2 (e.g., panels c and f) are quite obscure and need more context and explanation. In the case of panel c it would be helpful if the location of the snapshot relative to the larger scale flow on a weather map could be indicated for perspective purposes. Likewise, panel (f) supposedly references a convective updraft. Is this updraft located in the warm sector of an extratropical cyclone or elsewhere? Again, more context is needed.

Thank you for telling us that some of the panels in Fig. 2 are not appropriately explained and discussed. We will improve the caption and make sure that each panel is briefly discussed in the text. However, since these schematics are often the synthesis of detailed papers, we cannot become extensive, and the very interested reader should consult the original references.

Line 196: Check that "Q" was defined previously.

Omega in equation 3 needs to be defined for completeness.

The "M" lines on the Fig. 3c panel are undefined.

Define WCB on line 230 even though we all know what it means.

Thanks, we will include these amendments.

Lines 233–242: Perhaps a relationship between the magnitude and spatial scale of a PV anomaly and the associated induced tropospheric wind and thermal fields can be referenced quantitatively here? In other words, consider including the Rossby penetration depth and its relation to the static stability in the context of moist processes to add clarity for sections 2.2, 4 and 5.2.1.

This is quite difficult as the quantitative relationship depends strongly on static stability. However, we agree that this is a very important aspect, and we plan to add a new Fig. 2 on PV inversion including Alan Thorpe's figures and also possibly a figure on inversion of a midlevel PV anomaly, e.g., from p. 285 of the Hoskins and James book.

Lines 259-262: What does the DSI (dynamical state index) tell us that we don't already know by other means?

The DSI is mainly an alternative view on PV dynamics, which has not been applied a lot and it is therefore not yet clear how it adds to the general understanding of diabatic processes. Weber and Nevir (2008), who studied the dynamics of the Lothar storm, concluded that "The DSI structures during the intensification phase of 'Lothar' correspond very well with the results of a high-resolution model simulation of the 2 PVU isosurface (Wernli et al., 2002) at this time". In the revised version we will refer to this DSI study in Sect. 5.2.6 (where the Lothar storm is discussed).

Fig. 3b is not very readable. No point in showing a figure that requires the use of a magnifying glass to read it properly.

Likewise, Fig. 3c needs more explanation to be understood properly.

Define the two dipole axes in Fig. 3e. This figure panel needs more explanation to be understood.

We will improve all these panels in Fig. 3. For Fig. 3b we zoom in a bit more and add some colouring; and Figs. 3d and 3e will be better explained in the caption. We will also increase the size of the panels (changing the aspect ratio of the figure from landscape to portrait).

Sections 3.3–3.4 are excellent.

Many thanks!

Section 3.5 is also excellent.

Many thanks!

You might want to emphasize that very important aspect of the Presidents' Day storm of Feb 1979 as discussed by Bosart (1981) was the comparatively low level ( $\sim 900$ -hPa) of the ascent maximum associated with coastal front cyclogenesis (see his Fig. 9b and subsequent figures below) and the associated low-level frontogenesis maximum at  $\sim 950$ -hPa (Fig. 10c). Note also the derived kinematic ascent maximum below 800-hPa in Fig. 14. This low-level ascent maximum ensured that strong low-level cyclonic vorticity was being generated along the aforementioned coastal front. Subsequently, the arrival of the upper-level trough fostered impressive rapid surface cyclogenesis (see Fig. 18), given the presence of pre-existing cyclonic vorticity along the antecedent coastal front. Bottom line: The low-level  $d(\omega)/dp$  profile was critical for the rapid spin-up of the Presidents' Day cyclone and should be mentioned.

Many thanks for this detailed discussion. We will include these important aspects in the discussion of the President's Day storm.

Section 4.1.1 is excellent overall.

Many thanks.

In section 4.1.1 consider showing and/or referencing a  $d(\omega)/dp$  for the aforementioned Presidents' Day storm paper to help the reader better understand how the rapid growth of low-level vorticity along the coastal front occurred.

We will point out that vertical velocity increased rapidly with height (i.e. decreased rapidly with pressure) and peaked at low levels along the coastal frontogenesis region of the storm as shown in Fig. 14 and 9b of Bosart (1981). We will add a sentence on this.

Section 4.1.2 is also excellent overall.

Many thanks.

PV Inversion, Trajectories, and Model Simulations (lines 670-677): Excellent discussion of Davis and Emanuel (1991) and Hoskins and Berrisford (1988). From my personal perspective, Hoskins and Berrisford (1988) was an eye-opening paper and a “must read” paper as well.

Thank you, we fully agree about the relevance of the Hoskins and Berrisford paper!

Line 704 and subsequent lines. Nice discussion of the warm-conveyor belt to include the Nieman and Shapiro papers. Other relevant Mel Shapiro papers that you cite include Shapiro (1976), and Keyser and Shapiro (1993). What may not be fully appreciated is that Mel Shapiro obtained all kinds of critical mesoscale data on upper-level fronts via his research flights on NCAR and NOAA aircraft. These aircraft-derived datasets permitted him (and others) to make the calculations on the evolution of PV in upper level fronts and associated PV anomalies that are discussed in this section.

Thank you; good point to emphasize more that these aircraft observations were also very important for elucidating the structure and amplitude of mesoscale PV anomalies. We will do so.

Good discussion of the important escalator-elevator concept on lines 715-720.

Thanks.

Lines 754–760: Very important insight by Reed and Albright (1986) on how fast symmetric instability can develop in an explosively deepening bomb cyclone.

Thank you, we felt that no changes are needed.

Lines 784–787: Thanks for reminding me of the importance of the Shutts (1990a, 1990b) papers with regard to SCAPE (an open and “shutt” case to make a bad pun).

Thanks, due to your remark the first author learned about the expression “an open-and-shut case”!

Section 4.1.3: Frontal Wave Cyclones

Key point on lines 810-815: Breakthrough in understanding frontal wave cyclones inspired by the Hoskins and Berrisford (1988) diagnostic study on the infamous UK October storm and related papers by Thorpe and Emanuel, 1985; Joly and Thorpe, 1990; Schär and Davies, 1990; and Malardel et al., 1993). These papers (and others) collectively revealed how diabatically produced bands of low-level PV were a prerequisite for the occurrence of low-level frontal wave instability.

We agree; to make this paragraph stronger we transform the remark about the idealized studies being discussed later into a footnote and we use your phrasing “These papers (and others) collectively revealed ...”. Also, we will note that the Bosart papers about the President’s Day cyclone pointed out the importance of the development of the vorticity strip along the front.

Lines 814-815 make an important point about the “essential role of diabatically produced low-level bands of PV or surface as a prerequisite for frontal wave instability to occur.” Highlight this point a bit more?

Good point! We will also include a reference to Sect. 4.3.4 (idealized frontal wave simulations), where the recognition of the importance of the low-level PV band was again essential.

Lines 847-850: Reference Fig. 9 from Rogers and Bosart (1986), given that this figure shows that the saturation equivalent potential temperature maximizes in excess of 315 K over the cyclone center at the time of lowest SLP? There is also an ~13 K increase in the saturation equivalent potential temperature over the cyclone center in the 24 h period ending 1200 UTC 4 October 1965.

Thanks for this suggestion, we will add a reference to Fig. 9 from the mentioned paper with a brief explanation.

Lines 850-855: Discuss the assorted composites of East Coast cyclones from Manobianco (1989a) in a bit more detail?

Fine, we will add more details in the revised manuscript.

Lines 895-900: This text “screams” for a supporting illustrative figure.

Please see reply to next comment.

The excellent text on lines 900-920 would benefit from the addition of at least one new trajectory-related figure. WCB discussion on lines 900-966 would benefit from the addition of a couple of new figures.

We will include one additional figure with several panels supporting the text on lines 895-966. In particular, we would like to illustrate how different variables evolve along WCB trajectories.

Existing Figs. 7e,f are inadequate. Redo existing Fig. 7 into panels a-d and create a new figure consisting of the old e and f panels from Fig. 7? Check also whether Fig. 7f is adequately referenced in the text.

Maybe it was not clear that the last two panels were referred to as Fig. 7e (there was no Fig. 7f). We make this clearer by adding a frame around the two panels. We also agree that these panels had low quality (side remark: something went wrong with this paper when formatted by

the journal; the original figures looked much better). We therefore decided to now use the versions of these figures from the first author's doctoral thesis (which had nicer gray shading).

Section 4.1.5 (Lagrangian view and coherent airstreams) is very well done.

Many thanks.

Cordeira and Bosart (2011;

[https://journals.ametsoc.org/view/journals/mwre/139/6/2010mwr3537.1.xml?tab\\_body=pdf](https://journals.ametsoc.org/view/journals/mwre/139/6/2010mwr3537.1.xml?tab_body=pdf))

would be an appropriate additional reference for the evolution of PV structure in a tropical cyclone (Grace) that formed via a tropical transition (see Fig. 2, 4, 7, 11, and 12)

Thanks, we will include a reference to this paper in Sect. 5.2.3 where we briefly mention the phenomenon of tropical transition.

Figures:

The text-figure balance needs to be improved. There is a lot of text and comparatively few relevant illustrative figures. It is also unfortunate that few if any color figures are available from the older literature. I would like to suggest that the authors try to grab more relevant figures from the refereed literature to illustrate key points and bolster key arguments advanced in the text. It might also be appropriate for the authors to construct a few additional schematic figures to help to better illustrate/reinforce key points that they are trying to make in the text. Any new schematic figures should be constructed in color. Can existing black and white figures be digitized and then converted to color images using AI methodologies?

Many thanks for pointing out that the figures are useful, but that their quality needs to be improved and that even more figures might be appropriate. We will implement the following changes to the figures:

- We will arrange the panels differently such that they become larger.
- For certain black and white figures, we add subtle colouring of key features to enhance readability.
- We will include additional figures about trajectories (see above), about PV inversion, and for the new subsection on "Consideration of radiative and surface flux related diabatic processes".
- We also seriously considered the suggestion to add (new) schematics, but while we liked the idea, we struggled with its realization. It is very difficult to do justice to the complexity of the theme with a few schematics. However, we add the schematic Fig. 1 from Schäfler et al. (2016) in Sect. 5.4 and note that we emphasized the general value of schematics in L3014 of the original manuscript.

Multi-panel Figure 7 is in desperate need of improvement (or color!). Geography is mostly unreadable in panels b and c. Panel c is "fuzzy". Panels d-f demand improvement to be more readable because in present form they do not do justice to the text.

See above.



Lines 1152-1177: This discussion seems out of place here. I get that you have a separate section entitled: More Systematic Investigations. That said, the distinction seems a bit forced. Personally, I would have welcomed this discussion earlier in the text.

We agree and integrated Sect. 4.2.2 into 4.2.1. Thanks for this suggestion.

Section 4.2.3: PV perspective on moist vs. dry experiments: I can't decide whether this section works best as a stand-alone section as it is now or whether the findings documented in this section should be integrated into earlier sections.

We agree that the alternative suggestion would work as well. For pragmatic reasons, we leave the structure as is. Also, Sect. 4.2 is relatively long, such that the separation of the content in three subsections might help the reader.

I am OK with section 4.3: Idealized numerical simulations of cyclones.

Thank you.

Lines 1305-1318: Discussion of Emanuel (1987) is well done.

Thanks!

Lines 1434-1457: This section, especially beginning with the discussion of Thorncroft and Hoskins (1990) on line 1441, seems especially relevant. That said, I could easily argue that this discussion is out of place and should appear earlier. Although I understand why the authors did what they did, it seems to me that an equally convincing argument can be made to embed this material into an earlier section.

We agree that here (and in many other places), there would be good arguments for rearranging some parts of the text. Here, our intention was to have enough emphasis on idealized frontal wave instability studies, which, in our view, are different from the classical baroclinic wave studies. One reason for this is that the pioneering studies by Eady and Charney set the basis for understanding large-scale baroclinic instability in the mid-20<sup>th</sup> century, but it took four more decades until similar instability concepts could satisfactorily explain smaller-scale frontal waves. We think that this is best highlighted with the separate section 4.3.4, which comes at the cost that the study by Thorncroft and Hoskins (and related material in this section) may appear a bit disconnected from the earlier parts of Sect. 4.3.

Personally, I find the climate change argument (footnote 15) unconvincing.

We were not aware of the study by Branscome and Gutowski (1992) before writing this review, and we found it fascinating that, technically, they did an idealized sensitivity experiment on the effects of enhanced humidity, but unlike the simulations summarized in Sect. 4.3.2, which were typically motivated by the need to understand the effects of latent heating, Branscome and

Gutowski (1992) motivated their study with global warming. Since we found this duality of motivations remarkable, we added this footnote.

General comment after scrutinizing sections 2-4. I would like to reinforce what I said earlier. The ratio of text to figures is too high throughout. There are a number of places throughout the text where the inclusion of additional figures would make it easier to follow the discussion. That said, figure quality needs to be significantly improved in many places. I fully appreciate that this presents a problem for old non-digitized black and white figures. A possible compromise might be to separate multi-panel black and white figures that are marginally readable (at best) into individual single or double figures that are larger and possibly easier to read.

See above, where we addressed the helpful comments about how to improve the figures.

Additional Comments by Bosart Ph.D. students: Tyler Leicht and Alexander Mitchell

I've finished my review of the Wernli and Gray review paper. It is an exceptionally well-written paper, covering nearly 150 years of research in great detail. I think this will be a great research and educational resource for years to come. I only have a few minor comments that I think could improve the paper if considered.

Many thanks for your very positive overall assessment!

In section 2.1, I would like to see a (brief) description of the QG height tendency and omega equations as they relate to diabatic heating. I know the paper mainly focuses on a PV perspective, but in order to argue that PV thinking is best for understanding the impact of diabatic heating on midlatitude weather systems (stated on line 3019), one must first outline the QG perspective and compare the two frameworks. QG theory is alluded to in sections 2.2, 3.4, and 3.5, but the reader does not have an immediate reference in this text to the equations the way they do for the PV fundamentals.

Many thanks, we thought about including a (brief) discussion of QG theory, but we felt that this would make the scope of the paper too large. But we now reference the AMS encyclopaedia article by Davies and Wernli about QG theory. And when we emphasize the usefulness of the PV concept for understanding the impact of diabatic heating, then this was not meant as “in contrast to QG theory”. The PV concept is a core element of QG theory, although for investigating the scales at which diabatic processes are most effective, QG theory is not always of high enough accuracy.

I would also rephrase the sentence ending in line 2965 stating that QG theory is synonymous with dry dynamics, since my view is that QG and PV can both be treated adiabatically and diabatically.

Thanks for pointing this out. We agree with this comment and will rephrase this sentence to avoid the misconception that QG theory is synonymous with dry dynamics. The best is to simply omit the reference to QG theory in this sentence.

Otherwise, I think this was a very successful review paper. Let me know what you think of my suggestion, and I'll be curious to see what you and Alex think would improve this paper.

[We assume that this is comment from Tyler to Lance and Alex.](#)

Overview:

The manuscript, “The importance of diabatic processes for the dynamics of synoptic-scale extratropical weather systems—a review” is thorough and offers a comprehensive overview of the history of extratropical cyclone dynamics using a PV framework. The authors demonstrate a strong foundation of synoptic-scale extratropical dynamics and present a clear and accessible synthesis of the historical literature. The inclusion of recent references and an overall balanced discussion add significant value for the reader.

[Many thanks!](#)

Lines 233–242: Perhaps a relationship between the magnitude and spatial scale of a PV anomaly and the associated induced tropospheric wind and thermal fields can be referenced quantitatively here? In other words, consider including the Rossby penetration depth and its relation to the static stability in the context of moist processes to add clarity for sections 2.2, 4 and 5.2.1.

[See above \(this comment appears twice\).](#)

Minor Comments:

Many thanks for the careful reading and the many useful suggestions to improve our writing. Much appreciated! We implemented all these suggestions listed on the following page for Sect. 1-6 (and we therefore don't respond to each of them separately).

Section 1:

Line 98: Should quasi-geostrophic be abbreviated as (QG) throughout the article?

Line 110: Remove hyphen for “life-cycles”

Lines 110-114: Consider splitting these into 2 sentences

Line 116: Revise to “clouds can”

Line 117: Revise to “..Carbone, 2004), and...”

Line 121: Revise to “..up to several 1000 km”..

Line 138: Revise to “..and challenges to stimulate further..”

Section 2:

Line 206: Define  $\theta$ ?

Line 265: Revise to “..subsequent precipitation usually occur through”

Line 301: Revise to “..However, as discussed by Schultz and Schumacher (1999), many..”

Lines 349–355: Consider splitting this into two sentences.

Line 394: Remove the comma after “currents”

Section 3:

Lines 375–379: Insert “(a)”, “(c)” and “(d)” as well since (b) is written in the sentence.

Line 402: Revise to “..and examined stability criteria..”

Lines 486–487: Revise to “..at the level of maximum wind speed. The hypothesis was made that these maxima were diabatically..”

Lines 489–492: Revise to “..It is interesting to note that the initial research on STE near upper-level fronts and tropopause folds mainly discussed how radiation and turbulence can modify PV, but overlooked the potential effects of latent heat release in clouds. However, this focus changed almost 20 years later..”

Lines 510–512: Omit “In”

Line 526: Revise to “We claim this paradigm shift..”

Section 4:

Line 568: Revise to “..novel data thanks to..”

Line 573: Revise to “..they have served as..”

Line 589: Revise to “..together with the ascent..”

Line 623: Add comma, “In several of the studies, the..”

Line 700: Revise to “..was considered the main reason..”

Line 703: Revise to “..to present an overview of the..”

Line 729: Revise to “..first to quantify..”

Lines 877–878: Revise to “This subsection summarizes research from 1980–2000 on using trajectories to investigate moist airstreams and extratropical cyclone dynamics.”

Section 6:

Line 2974: Revise to “..time failed to predict these..”

Line 3012: Add a comma after “for instance”

Line 3024: Add a comma after “More recently”

Lines 3049–3054: Revise to “This improvement will allow for better representation of steep topography and the ability to turn off the parameterization of deep moist convection. In the context of this review article, this implies that, e.g., fast-ascending motion in convective cloud systems and associated diabatic processes will be simulated with the same numerics and cloud microphysics as the more slowly ascending and larger-scale warm conveyor belts. As discussed in Sect. 5.5.2, this change will have direct implications for the diabatic modification of PV in the upper troposphere and, in turn, for the large-scale flow evolution.”

[Thanks, we will revise these sentences as suggested.](#)

Potential additional references (aka shameless plugs) to add to the Wernli and Gray Review Paper. Use anywhere from 0–48 of these suggested references as you see fit.

[Many thanks for adding this impressive list of very interesting papers. We will include the ones that specifically address diabatic processes \(and that we missed including in the first place\).](#)

Several papers in the list are about ET – a topic for which we decided to be comparatively brief because of the recently published excellent two-part review paper about ET written by the ET experts (which we are not). Therefore, we prefer not to add more papers about ET. Thanks for your understanding.

1. Archambault et al. (2010): Relationships between Large-Scale Regime Transitions and Major Cool-Season Precipitation Events in the Northeastern United States
2. Archambault et al. (2013): A Climatological Analysis of the Extratropical Flow Response to Recurring Western North Pacific Tropical Cyclones
3. Archambault et al. (2015): A Composite Perspective of the Extratropical Flow Response to Recurring Western North Pacific Tropical Cyclones
4. Bals-Elsholz et al. (2001): The Wintertime Southern Hemisphere Split Jet: Structure, Variability, and Evolution
5. Bentley et al. (2017): Upper-Tropospheric Precursors to the Formation of Subtropical Cyclones that Undergo Tropical Transition in the North Atlantic Basin
6. Bentley et al. (2019): A Climatology of Extratropical Cyclones Leading to Extreme Weather Events over Central and Eastern North America
7. Bell and Bosart (1993): A Case Study Diagnosis of the Formation of an Upper Level Cutoff Cyclonic Circulation over the Eastern United States
8. Biernat et al. (2023): A Climatological Comparison of the Arctic Environment and Arctic Cyclones between Periods of Low and High Forecast Skill of the Synoptic-Scale Flow
9. Bosart (1984): The Texas Coastal Rainstorm of 17–21 September 1979: An Example of Synoptic Mesoscale Interaction
10. Bosart and Bartlo (1991): Tropical Storm Formation in a Baroclinic Environment
11. Bosart and Dean (1991): The Agnes Rainstorm of June 1972: Surface Feature Evolution Culminating in Inland Storm Redevelopment
12. Bosart and Lackmann, 1995: Postlandfall Tropical Cyclone Reintensification in a Weakly Baroclinic Environment: A Case Study of Hurricane David (September 1979)
13. Bosart and Sanders (1986): Mesoscale Structure in the Megalopolitan Snowstorm of 11–12 February 1983. Part III: A Large-Amplitude Gravity Wave
14. Bosart and Sanders (1991): An Early-Season Coastal Storm: Conceptual Success and Model Failure
15. Bosart et al. (1996): Large-Scale Antecedent Conditions Associated with the 12–14 March 1993 Cyclone (“Superstorm '93”) over Eastern North America
16. Bosart et al. (1998): A Study of Cyclone Mesoscale Structure with Emphasis on a Large-Amplitude Inertia–Gravity Wave
17. Bosart et al. (2000): Environmental Influences on the Rapid Intensification of Hurricane Opal (1995) over the Gulf of Mexico
18. Bosart et al. (2012): An Analysis of Multiple Predecessor Rain Events ahead of Tropical Cyclones Ike and Lowell: 10–15 September 2008
19. Bosart et al. (2017): Interactions of North Pacific Tropical, Midlatitude, and Polar Disturbances Resulting in Linked Extreme Weather Events over North America in October 2007
20. Cordeira and Bosart (2011): Cyclone Interactions and Evolutions during the “Perfect Storms” of Late October and Early November 1991

21. Davis and Bosart (2001): Numerical Simulations of the Genesis of Hurricane Diana (1984). Part I: Control Simulation
22. Davis and Bosart (2003): Baroclinically Induced Tropical Cyclogenesis
23. Davis and Bosart (2004): The TT Problem: Forecasting the Tropical Transition of Cyclones
24. DiMego and Bosart (1982): The Transformation of Tropical Storm Agnes into an Extratropical Cyclone. Part I: The Observed Fields and Vertical Motion Computations
25. DiMego and Bosart (1982): The Transformation of Tropical Storm Agnes into an Extratropical Cyclone. Part II: Moisture, Vorticity and Kinetic Energy Budgets
26. Galarneau et al. (2009): Baroclinic Transition of a Long-Lived Mesoscale Convective Vortex
27. Galarneau et al. (2015): Development of North Atlantic Tropical Disturbances near Upper-Level Potential Vorticity Streamers
28. Griffin and Bosart (2014): The Extratropical Transition of Tropical Cyclone Edisoana (1990)
29. Hakim et al. (1995): The Ohio Valley Wave-Merger Cyclogenesis Event of 25–26 January 1978. Part I: Multiscale Case Study
30. Hakim et al. (1996): The Ohio Valley Wave-Merger Cyclogenesis Event of 25–26 January 1978. Part II: Diagnosis Using Quasigeostrophic Potential Vorticity Inversion
31. Lackmann et al. (1996): Planetary- and Synoptic-Scale Characteristics of Explosive Wintertime Cyclogenesis Over the Western North Atlantic Ocean
32. Lackmann et al. (1997): A Characteristic Life Cycle of Upper-Tropospheric Cyclogenetic Precursors during the Experiment on Rapidly Intensifying Cyclones over the Atlantic (ERICA)
33. McTaggart-Cowan et al. (2006): Analysis of Hurricane Catarina (2004)
34. McTaggart-Cowan et al. (2007): Hurricane Katrina (2005). Part II: Evolution and Hemispheric Impacts of a Diabatically Generated Warm Pool
35. McTaggart-Cowan et al. (2010): Development and Tropical Transition of an Alpine Lee Cyclone. Part I: Case Analysis and Evaluation of Numerical Guidance
36. McTaggart-Cowan et al. (2013): A Global Climatology of Baroclinically Influenced Tropical Cyclogenesis
37. Moore et al. (2013): Synoptic-Scale Environments of Predecessor Rain Events Occurring East of the Rocky Mountains in Association with Atlantic Basin Tropical Cyclones
38. Moore et al. (2019): Linkages between Extreme Precipitation Events in the Central and Eastern United States and Rossby Wave Breaking
39. O’Handley and Bosart (1989): Subsynoptic-Scale Structure in a Major Synoptic-Scale Cyclone
40. Papin et al. (2020): A Feature-Based Approach to Classifying Summertime Potential Vorticity Streamers Linked to Rossby Wave Breaking in the North Atlantic Basin
41. Pyle et al. (2004): A Diagnostic Study of Jet Streaks: Kinematic Signatures and Relationship to Coherent Tropopause Disturbances
42. Röthlisberger et al. (2019): Recurrent Synoptic-Scale Rossby Wave Patterns and Their Effect on the Persistence of Cold and Hot Spells
43. Sanders and Bosart (1985): Mesoscale Structure in the Megalopolitan Snowstorm of 11–12 February 1983. Part I: Frontogenetical Forcing and Symmetric Instability

44. Schultz et al. (1997): The 1993 Superstorm Cold Surge: Frontal Structure, Gap Flow, and Tropical Impact
45. Schultz et al. (1998): The Effect of Large-Scale Flow on Low-Level Frontal Structure and Evolution in Midlatitude Cyclones
46. Winters et al. (2019): The Development of the North Pacific Jet Phase Diagram as an Objective Tool to Monitor the State and Forecast Skill of the Upper-Tropospheric Flow Pattern
47. Winters et al. (2020a): Composite Vertical-Motion Patterns near North American Polar–Subtropical Jet Superposition Events
48. Winters et al. (2020b): Composite Synoptic-Scale Environments Conducive to North American Polar–Subtropical Jet Superposition Events

## Reviewer 6

Recommendation: minor revisions

This very comprehensive review on the topic of diabatic processes in synoptic extratropical weather systems will become the definitive guide for researchers in this field.

Many thanks for your positive overall assessment of our review!

The review covers the history of the development of the topic over the past century. I was tasked with reviewing the introduction and the second half of the manuscript, which is concerned mostly with developments over the past 20 or so years.

I particularly like the schematic diagram showing the structure of the manuscript and where different weather systems and phenomena can be found. This will be very helpful for readers who wish to dip in and out of the manuscript to navigate the huge wealth of information.

Thanks, we are glad that you explicitly mentioned the usefulness of this schematic.

The structure of the second half of the paper (section 5) is logical and easy to follow, covering different categories of extratropical cyclones, diagnostics and methods of analysing diabatic processes, features ranging from waveguides down to the mesoscale, and finally field experiments and climate change. The figures included are very nicely chosen to illustrate the key concepts explored.

Many thanks.

Another aspect of the paper that I particularly like is the inclusion of details on the contributions from women that have increased in the past 20 or so years. It is heartening to see both the improvement in gender equality in this research area, and also the acknowledgement that there was an improvement to be made in the first place.

We both fully agree 😊

Given the comprehensive nature of the review, and the present quality of the writing, it is difficult to find much to add. So, I only have a few minor comments and suggestions.

Line 1496: “Millennia” -> “millennium”.

Changed.

There are a number of uses of American English (where I think the majority of the text is written in British English). I will point out a few of these.

Line 1508: “generalizing”.

Line 1631: “categorization”.



Line 2236: “discretization”.

Line 2322: “visualize”.

Line 2506: “realizing”.

Page 96: “summarize”.

Line 1592: “southern hemisphere” -> “Southern Hemisphere”.

Line 1792: “northern hemisphere” -> “Northern Hemisphere”.

Line 1796: as points 3 and 4.

Thanks a lot, we will implement all these suggestions.

Line 1899: I don’t think it is obvious what “low frequency jet” means.

We add a short explanation: “... position of the low-frequency jet exit, i.e., on the position of the jet exit calculated with low-pass filtered winds.”

Line 1983: Perhaps the word “intensifies” is ambiguous here.

Thanks, we change the wording to “PV is diabatically produced ...”.

Line 2079: Perhaps the reference for the impermeability theorem could be added here also.

We add a reference to Haynes and McIntyre (1990).

Line 2229: “which is defined as events”, I think should be “which are defined as events”.

We think that “is” is correct in L2329, but if not, then the copy editing will correct it.

Line 2414: Here I noticed an inconsistency in the spelling of parameterisation/parameterization.

Thanks for spotting this, we will consistently use “parameterizations”.

Line 2661: It would be helpful to reference the section here with the equation.

Indeed, we add “(Eq. 7, see Sect. 2.1)”.

Line 3112: Suggest also citing Martius et al 2016 and Owen et al 2021.

References:

Martius O., Pfahl S., Chevalier C. (2016) A global quantification of compound precipitation and wind extremes, *Geophys. Res. Lett.*, 43 (14), pp. 7709-7717.

Owen LE, Catto JL, Stephenson DB, Dunstone NJ. (2021) Compound precipitation and wind extremes over Europe and their relationship to extratropical cyclones, *Weather and Climate Extremes*, volume 33, DOI:10.1016/j.wace.2021.100342.

Thanks for suggesting these references. There is a lot of literature about compound extremes and we don't intend to include this topic in a comprehensive way in our paper because most of these studies are of statistical nature and not directly about processes. However, we will add a reference to the Owen et al. paper, as it specifically links compound extremes to extratropical cyclones, which appear prominently in our review.
